# Supplementary material
Source: ML conference proceedings conference paper supplement (https://openreview.net/forum?id=ZLsZmNe1RDb)
Supplement: supplementary_material [file attachment]

# Social-and-Reinforcement-Learning

May 25, 2022

```
[1]: import numpy as np
import pandas as pd
import matplotlib.pyplot as plt

import itertools
import seaborn as sns

%load_ext autoreload
%autoreload 2

[2]: from literal_listener import StatelessLiteralListener
from literal_speaker import LiteralSpeaker
from pragmatic_listener import PragmaticListener
from learner import LearnerAgent

from configuration import TRUE_REWARDS

from visualizations import visualize_pragmatic_beliefs, plot_point_estimate
```

## 1 Cache Pragmatic Results

```
[3]: import json
import time

human_utterances = json.load(open("data/exp_utterances.json"))
```

### 1.1 Pragmatic - Uncertain

```
[4]: n_trials = 25
alphaS = 3
n_iters = 5

utterances_to_use = human_utterances
prior_var = 5
importance_samples = 100
unique_str="-v4-ER"
```

```

exp_literal = StatelessLiteralListener()
exp_speaker = LiteralSpeaker(exp_literal, utterances="exp", alphaS=alphaS)
exp_pragmatic_listener = PragmaticListener(exp_speaker)

start_time_ms = round(time.time() * 1000)

for i, u in enumerate(utterances_to_use):

    pragmatic = LearnerAgent.
    ↪ cache_pragmatic_thompson_sampling(exp_pragmatic_listener, u["utt"], ↪
    ↪ u["action_context"],
    ↪
    ↪ horizons=[1,2,4], workerid=u['workerid'],
    ↪
    ↪ n_trials=n_trials, prior_var=prior_var,
    ↪
    ↪ min_importance_samples=importance_samples,
    ↪
    ↪ n_iterations=n_iters, verbose=False,
    ↪
    ↪ unique_str=unique_str)

    if i%500 == 0:
        end_time_ms = round(time.time() * 1000)
        n_seconds = (end_time_ms - start_time_ms) / 1000
        print(f'Finished utterance {i} of {len(utterances_to_use)}, took ↪
    ↪ {n_seconds} seconds.')
        start_time_ms = end_time_ms

```

Finished utterance 0 of 2772, took 0.036 seconds.  
 Finished utterance 500 of 2772, took 1.05 seconds.  
 Finished utterance 1000 of 2772, took 0.992 seconds.  
 Finished utterance 1500 of 2772, took 0.987 seconds.  
 Finished utterance 2000 of 2772, took 0.983 seconds.  
 Finished utterance 2500 of 2772, took 0.986 seconds.

## 1.2 Pragmatic - Misaligned

```

[5]: start_time_ms = round(time.time() * 1000)

for i, u in enumerate(utterances_to_use):

    pragmatic = LearnerAgent.
    ↪ cache_pragmatic_thompson_sampling(exp_pragmatic_listener,

```

```

                                u["utt"],
↪u["action_context"],
                                ↵
↪workerid=u['workerid'], unique_str=unique_str,
                                ↵
↪prior_var=prior_var, min_importance_samples=importance_samples,
                                ↵
↪n_iterations=n_iters, n_trials=n_trials, verbose=False,
                                horizons=[1]) #
↪This changes

    if i%500 == 0:
        end_time_ms = round(time.time() * 1000)
        n_seconds = (end_time_ms - start_time_ms) / 1000
        print(f'Finished utterance {i} of {len(utterances_to_use)}, took
↪{n_seconds} seconds.')
        start_time_ms = end_time_ms

```

Finished utterance 0 of 2772, took 0.003 seconds.  
Finished utterance 500 of 2772, took 1.064 seconds.  
Finished utterance 1000 of 2772, took 1.022 seconds.  
Finished utterance 1500 of 2772, took 1.005 seconds.  
Finished utterance 2000 of 2772, took 1.001 seconds.  
Finished utterance 2500 of 2772, took 1.004 seconds.

```

[6]: start_time_ms = round(time.time() * 1000)

for i, u in enumerate(utterances_to_use):

    pragmatic = LearnerAgent.
    ↪cache_pragmatic_thompson_sampling(exp_pragmatic_listener,
                                u["utt"],
    ↪u["action_context"],
                                ↵
    ↪workerid=u['workerid'], unique_str=unique_str,
                                ↵
    ↪prior_var=prior_var, min_importance_samples=importance_samples,
                                ↵
    ↪n_iterations=n_iters, n_trials=n_trials, verbose=False,
                                horizons=[4]) #
    ↪This changes

    if i%500 == 0:
        end_time_ms = round(time.time() * 1000)
        n_seconds = (end_time_ms - start_time_ms) / 1000

```

```

        print(f'Finished utterance {i} of {len(utterances_to_use)}, took_
↪{n_seconds} seconds.')
        start_time_ms = end_time_ms

```

Finished utterance 0 of 2772, took 0.003 seconds.  
 Finished utterance 500 of 2772, took 1.011 seconds.  
 Finished utterance 1000 of 2772, took 1.018 seconds.  
 Finished utterance 1500 of 2772, took 1.037 seconds.  
 Finished utterance 2000 of 2772, took 1.012 seconds.  
 Finished utterance 2500 of 2772, took 1.031 seconds.

### 1.3 Pragmatic - Known

```

[7]: start_time_ms = round(time.time() * 1000)

for i, u in enumerate(utterances_to_use):

    pragmatic = LearnerAgent.
    ↪cache_pragmatic_thompson_sampling(exp_pragmatic_listener,
                                     u["utt"],_
    ↪u["action_context"],
                                     _
    ↪workerid=u['workerid'], unique_str=unique_str,
                                     _
    ↪prior_var=prior_var, min_importance_samples=importance_samples,
                                     _
    ↪n_iterations=n_iters, n_trials=n_trials, verbose=False,
                                     _
    ↪horizons=[u["horizon"]]) # This changes

    if i%500 == 0:
        end_time_ms = round(time.time() * 1000)
        n_seconds = (end_time_ms - start_time_ms) / 1000
        print(f'Finished utterance {i} of {len(utterances_to_use)}, took_
↪{n_seconds} seconds.')
        start_time_ms = end_time_ms

```

Finished utterance 0 of 2772, took 0.002 seconds.  
 Finished utterance 500 of 2772, took 1.006 seconds.  
 Finished utterance 1000 of 2772, took 0.974 seconds.  
 Finished utterance 1500 of 2772, took 0.948 seconds.  
 Finished utterance 2000 of 2772, took 0.981 seconds.  
 Finished utterance 2500 of 2772, took 0.989 seconds.

## 2 Load cached results

```
[8]: from configuration import utt_to_string

results = []

pragmatics_list = ["pragmatic_uncertain",
                   "pragmatic_misaligned_conservative",
                   "pragmatic_misaligned_pedagogic",
                   "pragmatic_aligned"]

for i, u in enumerate(utterances_to_use):

    for pragmatics in pragmatics_list:

        if pragmatics == "pragmatic_uncertain":
            horizons = [1, 2, 4]
        elif pragmatics == "pragmatic_aligned":
            horizons = [u["horizon"]]
        elif pragmatics == "pragmatic_misaligned_conservative":
            horizons = [1]
        elif pragmatics == "pragmatic_misaligned_pedagogic":
            horizons = [4]

        pragmatic = LearnerAgent.
        ↪cache_pragmatic_thompson_sampling(exp_pragmatic_listener,
                                         u["utt"],
                                         ↪u["action_context"],
                                         ↪workerid=u['workerid'], unique_str=unique_str,
                                         ↪prior_var=prior_var, min_importance_samples=importance_samples,
                                         ↪n_iterations=n_iters, n_trials=n_trials,
                                         ↪horizons=horizons) # This changes
        pragmatic["listener"] = pragmatics

        pragmatic["alphaS"] = alphaS
        pragmatic["horizon"] = u["horizon"]

        for k in ["color", "shape", "feature", "value", "type"]:
            pragmatic[k] = u["utt"].get(k)

        utt_str = utt_to_string(u["utt"])
        pragmatic["utt"] = utt_str
        pragmatic["utt_key"] = f'{u["action_context"]}-{utt_str}'
```

```

        pragmatic["trial_iteration_key"] = pragmatic["iteration"].apply(lambda x:
↪x: f'{u["action_context"]}-{u["workerid"]}-{x}')

        pragmatic["random_effects_key"] =
↪f'{u["action_context"]}-{u["workerid"]}'
        results.append(pragmatic)

```

## 2.1 Literal

```

[9]: for i, u in enumerate(utterances_to_use):

    random_effects_key = f'{u["action_context"]}-{u["workerid"]}'

    literal = LearnerAgent.cache_literal_thompson_sampling(u["utt"],
↪unique_str=random_effects_key,

                                                    n_iterations=n_iters,
                                                    n_trials=n_trials,
                                                    prior_var=prior_var,
                                                   
↪min_importance_samples=importance_samples,

                                                    verbose=False)

    literal["listener"] = "literal"
    literal["utt"] = utt_str

    for k in ["color", "shape", "feature", "value", "type"]:
        literal[k] = u.get(k)

    literal["trial_iteration_key"] = literal["iteration"].apply(lambda x:
↪f'{u}-{x}')
    literal['random_effects_key'] = random_effects_key
    results.append(literal)

    if i%500 == 0:
        print(f'Finished {n_iters} iters on utterance {i}.')

```

```

Finished 5 iters on utterance 0.
Finished 5 iters on utterance 500.
Finished 5 iters on utterance 1000.
Finished 5 iters on utterance 1500.
Finished 5 iters on utterance 2000.
Finished 5 iters on utterance 2500.

```

## 2.2 Individual Baseline

```
[10]: for i, u in enumerate(utterances_to_use):

    random_effects_key = f'{u["action_context"]}-{u["workerid"]}'

    individual_learning_results = LearnerAgent.
    ↪ cache_individual_thompson_sampling(n_iterations=n_iters,

    ↪ n_trials=n_trials,

    ↪ prior_var=prior_var,

    ↪ unique_str=random_effects_key)

    individual_learning_results["listener"] = "individual"

    individual_learning_results["trial_iteration_key"] = literal["iteration"].
    ↪ apply(lambda x: f'{u}-{x}')
    individual_learning_results['random_effects_key'] = random_effects_key
    results.append(individual_learning_results)

    if i%500 == 0:
        print(f'Finished {n_iters} iters on utterance {i}.')
```

```
Finished 5 iters on utterance 0.
Finished 5 iters on utterance 500.
Finished 5 iters on utterance 1000.
Finished 5 iters on utterance 1500.
Finished 5 iters on utterance 2000.
Finished 5 iters on utterance 2500.
```

## 2.3 Plot Results

```
[12]: results = pd.concat(results)
      results["horizon"] = results.horizon.fillna("N/A")

[13]: # Should have 2772 * 5 trials for each listener
      results.groupby(["listener"]).trial_iteration_key.nunique() / 5
```

```
[13]: listener
      individual                2772.0
      literal                  2772.0
      pragmatic_aligned         2772.0
      pragmatic_misaligned_conservative 2772.0
      pragmatic_misaligned_pedagogic    2772.0
      pragmatic_uncertain         2772.0
```

Name: trial\_iteration\_key, dtype: float64

```
[14]: import copy
```

```
to_plot = copy.deepcopy(results)
```

```
[15]: rename_dict = {"pragmatic_uncertain": "Pragmatic - Latent  $H$ ", "literal":  
    ↪ "Literal Listener", "individual": "Individual Learner"}  
to_plot = to_plot[to_plot.listener.isin(list(rename_dict.keys()))]  
  
to_plot["listener"] = to_plot.listener.apply(lambda x: rename_dict.get(x, x))  
hue_order = ["Pragmatic - Latent  $H$ ", "Literal Listener", "Individual Learner"]  
palette = ['green', 'black', 'gray']
```

```
[16]: sns.lineplot(data=to_plot, x='trial', y='future_rewards', hue='listener',  
    ↪ hue_order=hue_order, palette=palette,  
        linewidth=3, alpha=.6)  
  
plt.ylim(.75, 1.8)  
plt.axhline(1.75, c='k', label="Optimal", linestyle='--', linewidth=3, alpha=.6)  
plt.legend(loc='best', fontsize=15)  
  
ys = [1, 1.25, 1.5, 1.75]  
for y in ys:  
    plt.axhline(y, c='k', alpha=.2, linestyle='--', zorder=0)  
  
plt.yticks(ys, fontsize=15)  
plt.ylabel("Future Rewards", fontsize=20)  
plt.xticks([1, 5, 10, 15, 20, 25], fontsize=15)  
plt.xlim(1, 25);  
plt.xlabel("Individual Learning Actions", fontsize=20)  
  
# plt.xlim(.5, 15)
```

```
[16]: Text(0.5, 0, 'Individual Learning Actions')
```



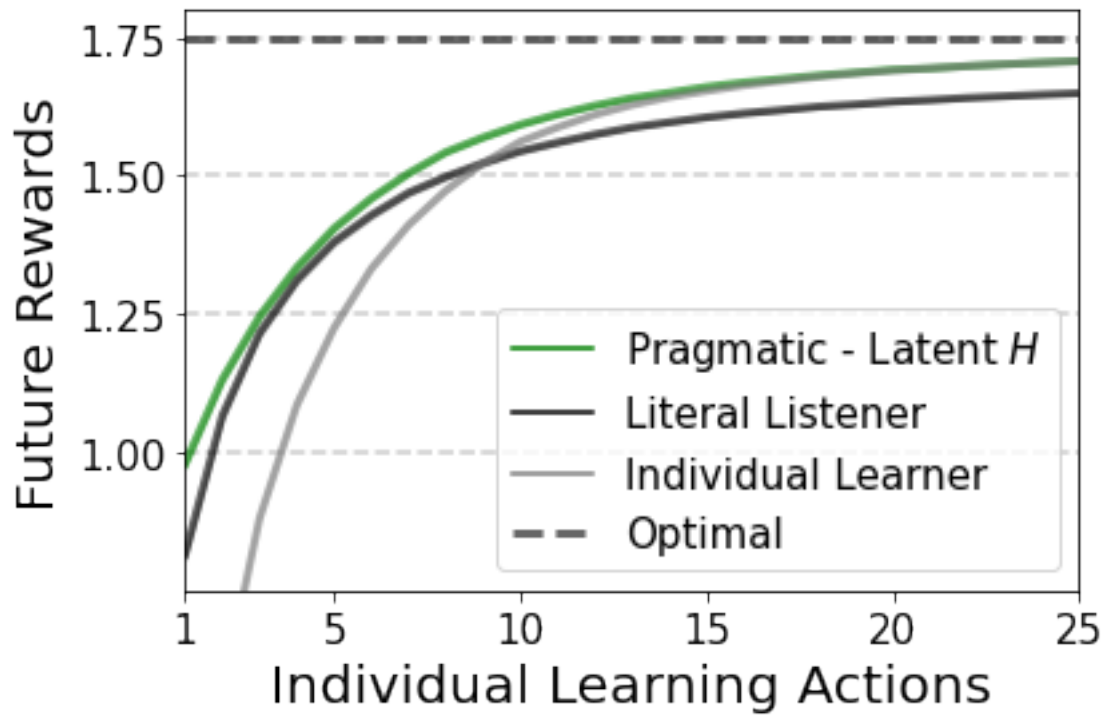

```
[17]: sns.lineplot(data=to_plot, x='trial', y='regret', hue='listener',
    ↪ hue_order=hue_order, palette=palette)

ys=[0, .25, .5, .75, 1, 1.25, 1.5, 1.75]
plt.yticks(ys, fontsize=15)
for y in ys:
    plt.axhline(y, c='k', alpha=.2, linestyle='--', zorder=0)

plt.ylabel("Regret", fontsize=20)
plt.xticks([1, 5, 10, 15, 20, 25], fontsize=15)
plt.xlim(1, 25);
plt.xlabel("Individual Learning Actions", fontsize=20)
plt.legend(fontsize=18)
```

```
[17]: <matplotlib.legend.Legend at 0x7f885efb3580>
```

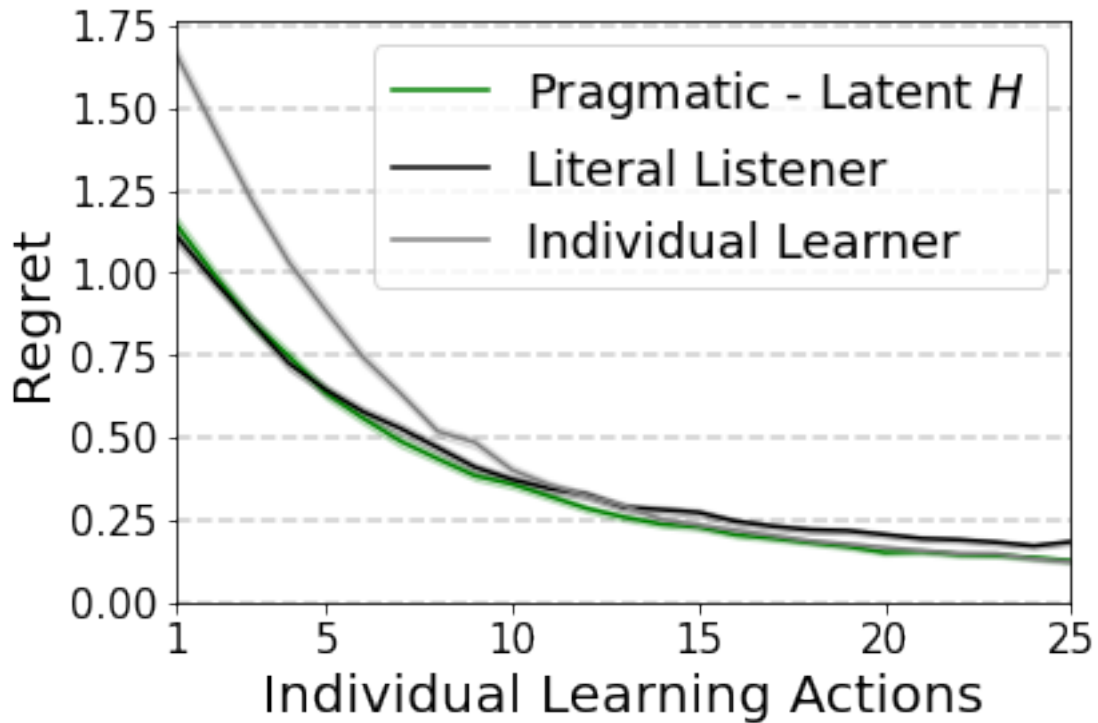

## 2.4 Summarize Results

```
[18]: results_to_summarize = results
```

### 2.4.1 Regret @ 25

```
[19]: regret_totals = results_to_summarize.groupby(["listener",
↪ "trial_iteration_key"])["regret"].sum().reset_index()
```

```
[20]: regret_totals.groupby("listener").regret.agg(np.mean).round(2)
```

```
[20]: listener
individual                12.14
literal                   10.23
pragmatic_aligned          9.42
pragmatic_misaligned_conservative  9.76
pragmatic_misaligned_pedagogic    9.67
pragmatic_uncertain        9.55
Name: regret, dtype: float64
```

```
[21]: ### Export to R
for_r = results_to_summarize.groupby(["listener", "trial_iteration_key",
↪ "random_effects_key"]).regret.sum().reset_index()
```

```
for_r["centered_regret"] = for_r.regret - for_r.regret.mean()

for_r
```

```
[21]:
```

|       | listener            | trial_iteration_key \                             |
|-------|---------------------|---------------------------------------------------|
| 0     | individual          | {'action_context': [{'color': 'blue', 'shape':... |
| 1     | individual          | {'action_context': [{'color': 'blue', 'shape':... |
| 2     | individual          | {'action_context': [{'color': 'blue', 'shape':... |
| 3     | individual          | {'action_context': [{'color': 'blue', 'shape':... |
| 4     | individual          | {'action_context': [{'color': 'blue', 'shape':... |
| ...   | ...                 | ...                                               |
| 83155 | pragmatic_uncertain | [{'color': 'red', 'shape': 'circle'}, {'color'... |
| 83156 | pragmatic_uncertain | [{'color': 'red', 'shape': 'circle'}, {'color'... |
| 83157 | pragmatic_uncertain | [{'color': 'red', 'shape': 'circle'}, {'color'... |
| 83158 | pragmatic_uncertain | [{'color': 'red', 'shape': 'circle'}, {'color'... |
| 83159 | pragmatic_uncertain | [{'color': 'red', 'shape': 'circle'}, {'color'... |

  

|       | random_effects_key                                 | regret \ |
|-------|----------------------------------------------------|----------|
| 0     | [{'color': 'blue', 'shape': 'circle'}, {'color'... | 8        |
| 1     | [{'color': 'blue', 'shape': 'circle'}, {'color'... | 8        |
| 2     | [{'color': 'blue', 'shape': 'circle'}, {'color'... | 16       |
| 3     | [{'color': 'blue', 'shape': 'circle'}, {'color'... | 8        |
| 4     | [{'color': 'blue', 'shape': 'circle'}, {'color'... | 27       |
| ...   | ...                                                | ...      |
| 83155 | [{'color': 'red', 'shape': 'circle'}, {'color'...  | 14       |
| 83156 | [{'color': 'red', 'shape': 'circle'}, {'color'...  | 10       |
| 83157 | [{'color': 'red', 'shape': 'circle'}, {'color'...  | 16       |
| 83158 | [{'color': 'red', 'shape': 'circle'}, {'color'...  | 11       |
| 83159 | [{'color': 'red', 'shape': 'circle'}, {'color'...  | 15       |

  

|       | centered_regret |
|-------|-----------------|
| 0     | -2.128595       |
| 1     | -2.128595       |
| 2     | 5.871405        |
| 3     | -2.128595       |
| 4     | 16.871405       |
| ...   | ...             |
| 83155 | 3.871405        |
| 83156 | -0.128595       |
| 83157 | 5.871405        |
| 83158 | 0.871405        |
| 83159 | 4.871405        |

[83160 rows x 5 columns]

```
[22]: for_r.to_csv("regret_results_for_r.csv", index=False)
```

## 3 Simulation Details

### 3.1 Gaussian Prior

How wide should initial variance be?

First, we want this to be large in order to approximate a uniform on the interval  $[-2, 2]$

However, for importance-sampling we need to sample from it and stay within the  $(-2.5, 2.5)$  range.

With variance=5 and 6 dimensions, we should get 66% of samples within  $(-2.5, 2.5)$  which means  $.66^6 \sim 8\%$  of our initial samples will be accepted.

```
[23]: from scipy.stats import norm
import math

variance = 5

interval = norm.interval(.66, loc=0, scale=math.sqrt(variance))
acceptance = .66**6

print(f'Interval of {interval} --> acceptance of {acceptance}.')
```

```
Interval of (-2.1335783678031857, 2.133578367803187) --> acceptance of
0.08265395001600002.
```
